# Supplementary material
Source: PubMed Central journal article supplement (PMC6939473)
Supplement: NIHMS1064166-supplement-1.pdf [file NIHMS1064166-supplement-1.pdf]

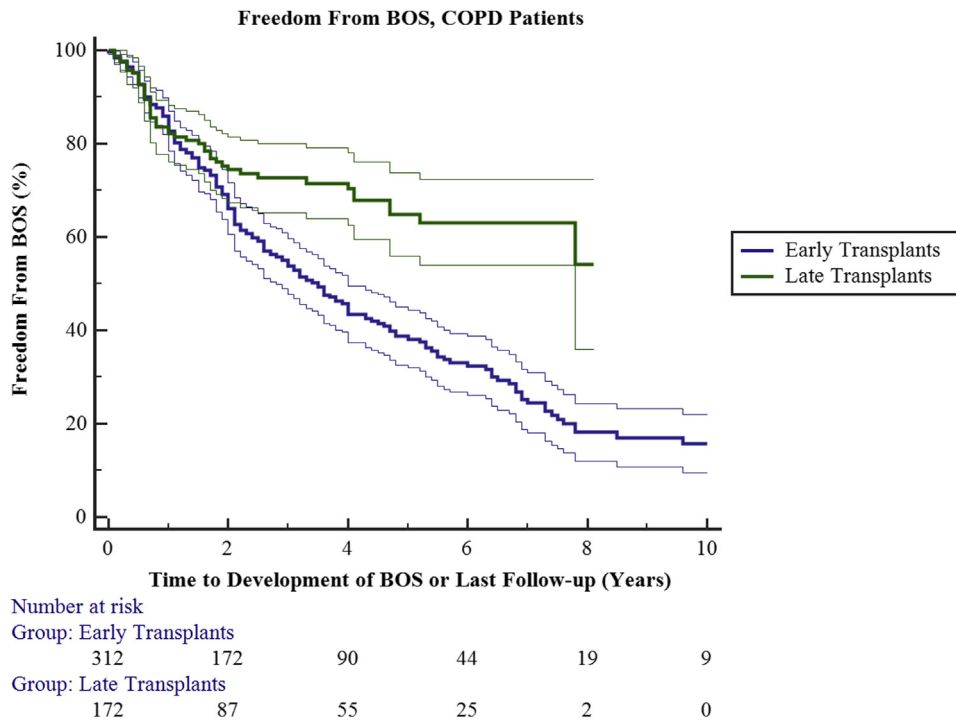

**FIGURE E1.** Freedom from bronchiolitis obliterans syndrome (BOS) for patients with chronic obstructive pulmonary disease, separated by group. Early transplant (pre-las) and late transplant (post-las) 95% confidence limits are represented by the *thin lines*. COPD, Chronic obstructive pulmonary disease.

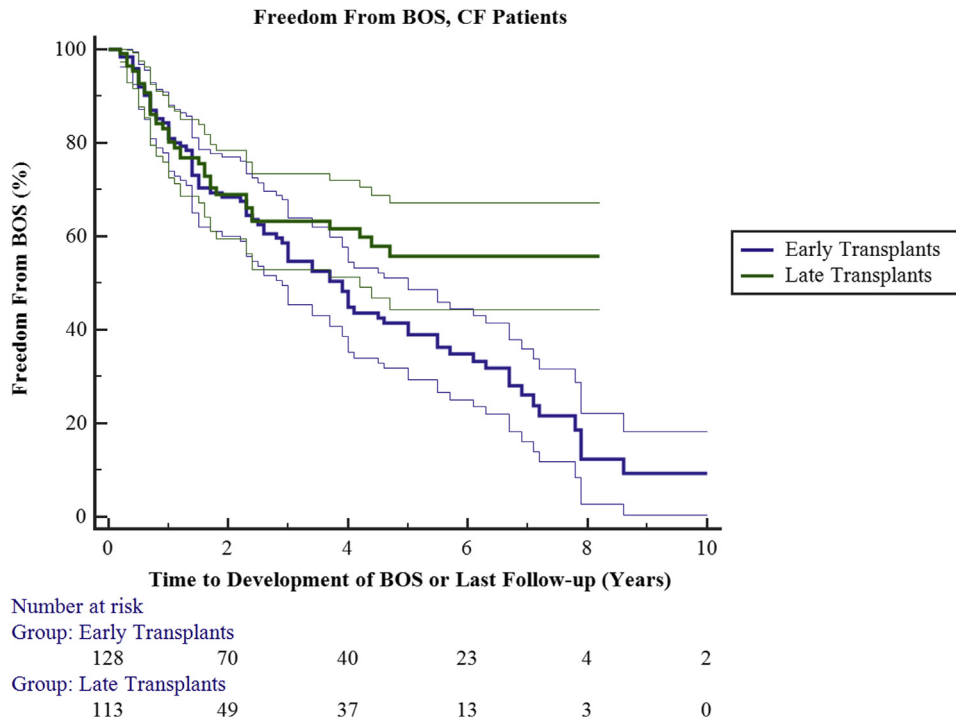

**FIGURE E2.** Freedom from bronchiolitis obliterans syndrome (BOS) for patients with cystic fibrosis, separated by group. Early transplant (pre-las) and late transplant (post-las) 95% confidence limits are represented by the *thin lines*. CF, Cystic fibrosis.

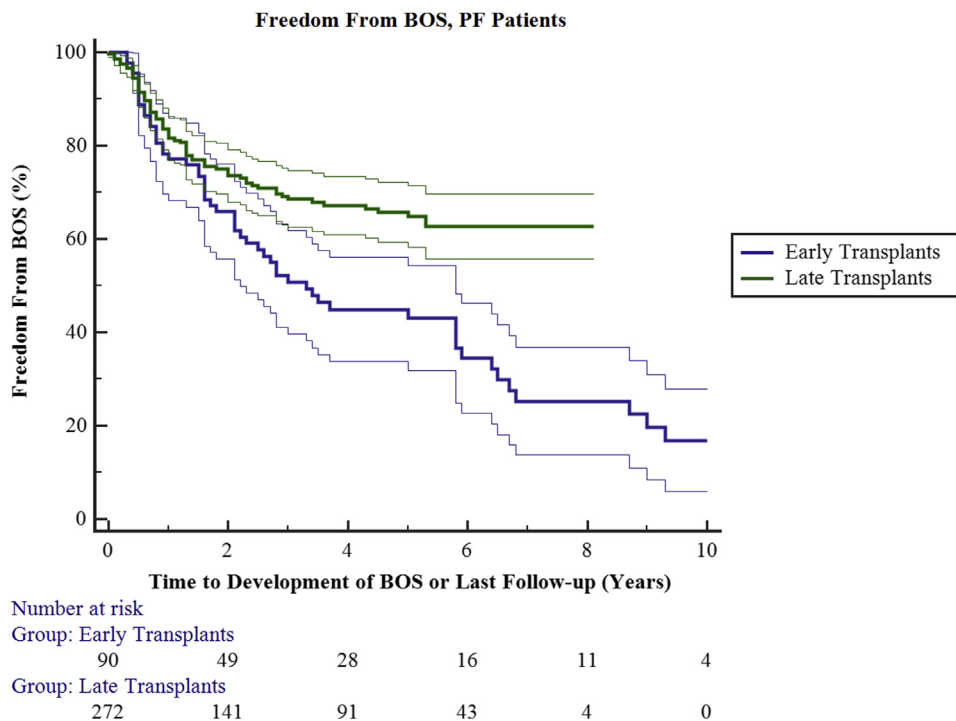

**FIGURE E3.** Freedom from bronchiolitis obliterans syndrome (*BOS*) for patients with interstitial pulmonary fibrosis, separated by group. Early transplant (pre-las) and late transplant (post-las) 95% confidence limits are represented by the *thin lines*. *PF*, Pulmonary fibrosis.

**TABLE E1.** Overall patient survival including patients at risk at 5-year intervals and mean survival with 95% confidence intervals, grouped by disease process

| Disease                               | Number at risk (5 y) | Number at risk (10 y) | Number at risk (15 y) | Number at risk (20 y) | Mean survival (y) | 95% confidence interval |
|---------------------------------------|----------------------|-----------------------|-----------------------|-----------------------|-------------------|-------------------------|
| Cystic fibrosis                       | 121                  | 68                    | 29                    | 7                     | 13.1              | 11.5-14.7               |
| Chronic obstructive pulmonary disease | 260                  | 135                   | 63                    | 13                    | 10.2              | 9.3-11.0                |
| Interstitial pulmonary fibrosis       | 145                  | 46                    | 10                    | 2                     | 12.2              | 10.7-13.6               |
| Other                                 | 183                  | 102                   | 49                    | 21                    | 11.2              | 10.0-12.4               |

**TABLE E2. Early transplant patient survival including patients at risk at 5-year intervals and mean survival with 95% confidence intervals, grouped by disease process**

| Disease                               | Number at risk (5 y) | Number at risk (10 y) | Number at risk (15 y) | Number at risk (20 y) | Mean survival (y) | 95% confidence interval |
|---------------------------------------|----------------------|-----------------------|-----------------------|-----------------------|-------------------|-------------------------|
| Cystic fibrosis                       | 76                   | 58                    | 29                    | 7                     | 12.2              | 10.3-14.1               |
| Chronic obstructive pulmonary disease | 193                  | 124                   | 63                    | 13                    | 10.0              | 9.1-10.9                |
| Interstitial pulmonary fibrosis       | 48                   | 31                    | 10                    | 2                     | 9.1               | 7.3-10.9                |
| Other                                 | 132                  | 90                    | 49                    | 21                    | 10.2              | 8.9-11.5                |

**TABLE E3. Late transplant patient survival including patients at risk at 2-year intervals and mean survival with 95% confidence intervals, grouped by disease process**

| Disease                               | Number at risk (2 y) | Number at risk (4 y) | Number at risk (6 y) | Number at risk (8 y) | Mean survival (y) | 95% confidence interval |
|---------------------------------------|----------------------|----------------------|----------------------|----------------------|-------------------|-------------------------|
| Cystic fibrosis                       | 78                   | 51                   | 35                   | 24                   | 7.8               | 6.9-8.8                 |
| Chronic obstructive pulmonary disease | 121                  | 84                   | 50                   | 27                   | 7.1               | 6.3-7.9                 |
| Interstitial pulmonary fibrosis       | 186                  | 121                  | 72                   | 38                   | 8.6               | 7.9-9.2                 |
| Other                                 | 87                   | 63                   | 41                   | 27                   | 8.1               | 7.3-9.0                 |
